# Supplementary material for: Agathis robusta Bark Essential Oil Effectiveness against COVID-19: Chemical Composition, In Silico and In Vitro Approaches
Source: MDPI journal article supplement (doi:10.3390/plants11050663), 2022-02-28
Supplement: s1 [file s1]

# Chemical composition of *Agathis robusta* bark essential oil: In silico and in vitro antiviral activities against COVID-19.

Maged E. Mohamed <sup>1, 2,\*</sup>, Nora Tawfeek <sup>2</sup>, Samar S. Elbaramawi <sup>3</sup>, Eman Fikry <sup>2</sup>

<sup>1</sup> Department of Pharmaceutical Sciences, College of Clinical Pharmacy, King Faisal University, 31982 Al-Ahsa, Saudi Arabia; [memohamed@kfu.edu.sa](mailto:memohamed@kfu.edu.sa)

<sup>2</sup> Department of Pharmacognosy, Faculty of Pharmacy, Zagazig University, Zagazig 44519, Egypt; [noratawfeek@zu.edu.eg](mailto:noratawfeek@zu.edu.eg) (N.T.); [efhassan@zu.edu.eg](mailto:efhassan@zu.edu.eg) (E.F.)

<sup>3</sup> Department of Medicinal Chemistry, Faculty of Pharmacy, Zagazig University, Zagazig 44519, Egypt; [sselbaramawy@pharmacy.zu.edu.eg](mailto:sselbaramawy@pharmacy.zu.edu.eg)

\* Correspondence: [memohamed@kfu.edu.sa](mailto:memohamed@kfu.edu.sa); Tel.: (optional; include country code; if there are multiple corresponding authors, add author initials)

## Supplementary material

**Table S1.** 3D-Binding mode of the major components of *A. robusta* bark EO inside the Mpro active site (PDB code: 6LU7).

| Component name   | 3D Protein- Ligand interaction                                                       | Energy score (S) (kcal/mol)/RMSD (Å) |
|------------------|--------------------------------------------------------------------------------------|--------------------------------------|
| Tricyclene       | 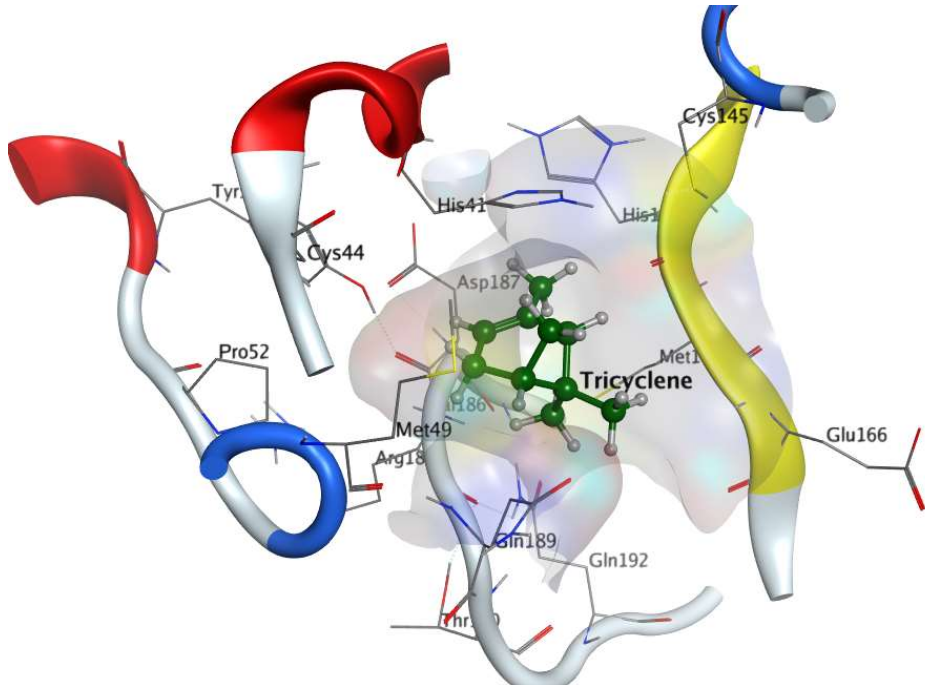  | <p>-4.6674</p> <p>1.4627</p>         |
| $\alpha$ -Pinene |  | <p>-4.7570</p> <p>1.2320</p>         |

|                          |                                                                                     |                              |
|--------------------------|-------------------------------------------------------------------------------------|------------------------------|
| <p><i>d</i>-Camphene</p> | 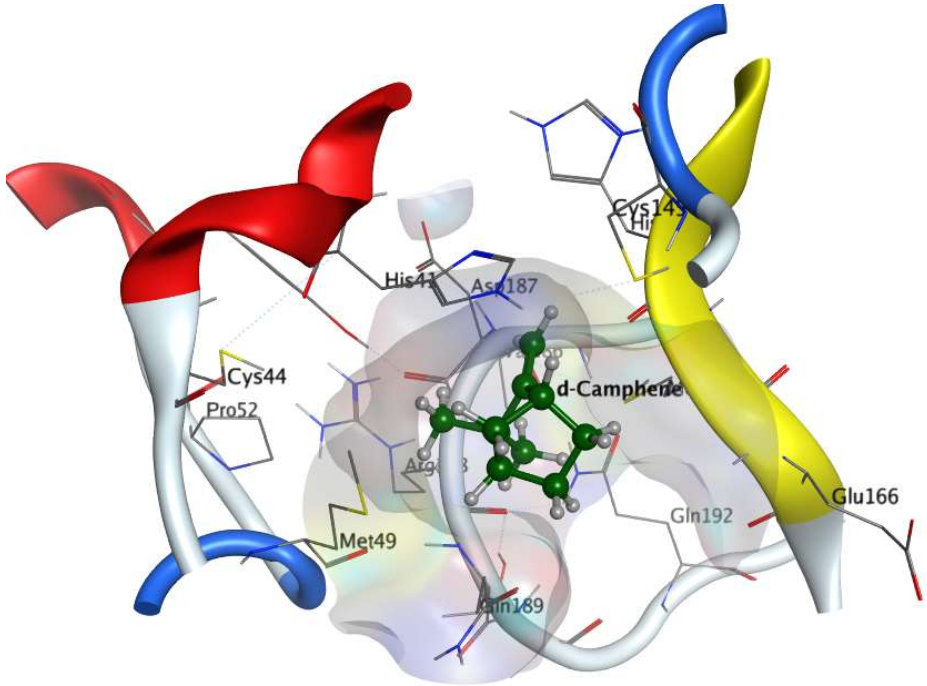  | <p>-4.4746</p> <p>1.7971</p> |
| <p>Limonene</p>          |  | <p>-4.7005</p> <p>1.6112</p> |

|                                 |                                                                                     |                               |
|---------------------------------|-------------------------------------------------------------------------------------|-------------------------------|
| <p><i>trans</i>-Pinocarveol</p> | 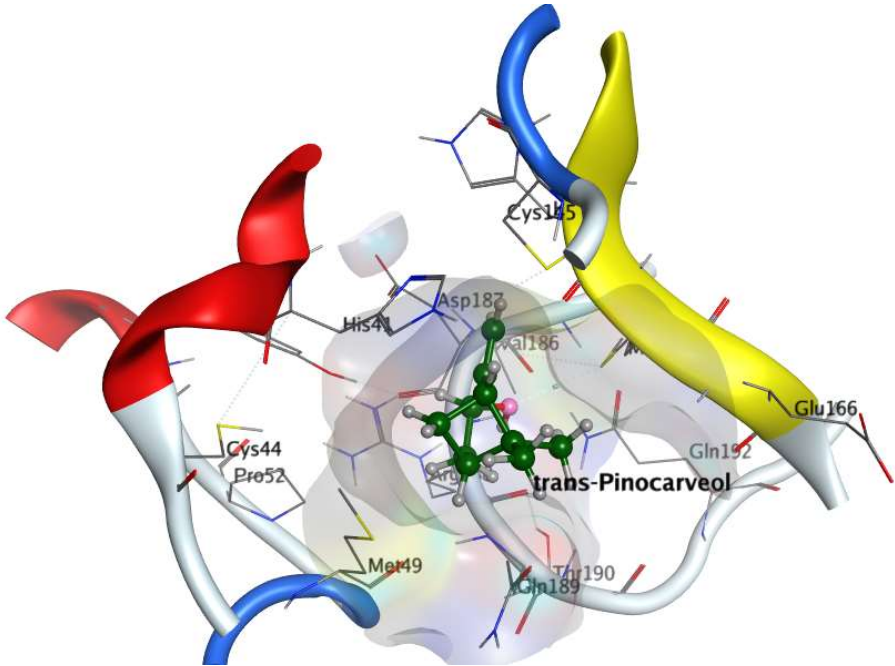  | <p>-4.59218</p> <p>2.0991</p> |
| <p>Borneol</p>                  |  | <p>-4.1916</p> <p>1.1248</p>  |

|                                             |                                                                                              |                              |
|---------------------------------------------|----------------------------------------------------------------------------------------------|------------------------------|
| <p><math>\alpha</math>-Phellandren-8-ol</p> | 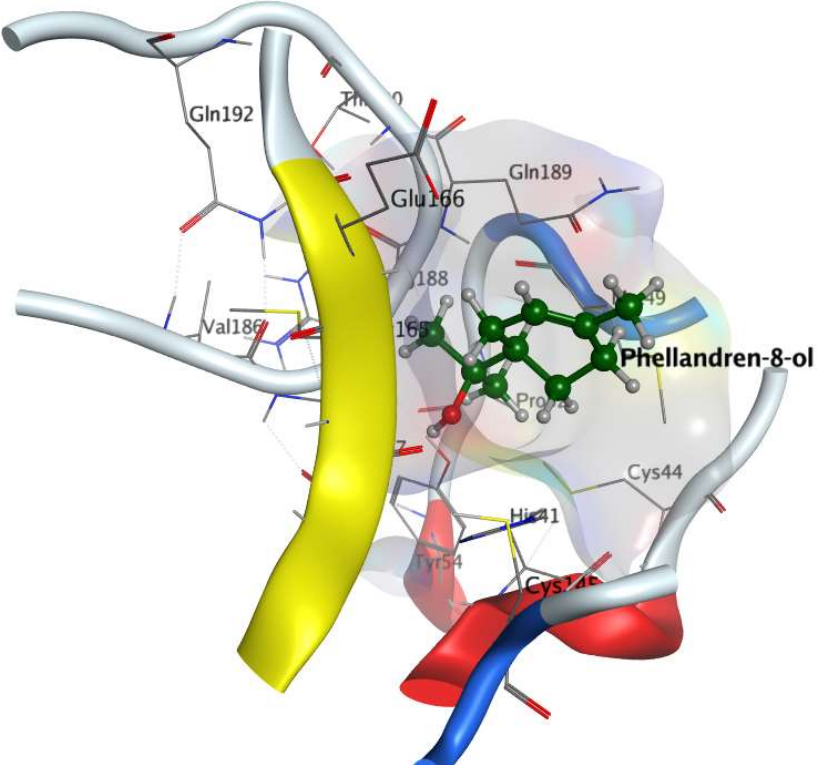           | <p>-4.9801</p> <p>1.1112</p> |
| <p><math>\alpha</math>-Terpineol</p>        | <p>5</p>  | <p>-5.0752</p> <p>1.7314</p> |



**Table S2.** 3D-Binding mode of the major components of *A. robusta* bark EO inside Covid-19 RNA-dependent RNA polymerase (PDB code: 7D4F).

| Component name | 3D Protein- Ligand interaction                                                      | Energy score (S) (kcal/mol) /RMSD (Å) |
|----------------|-------------------------------------------------------------------------------------|---------------------------------------|
| Tricyclene     | 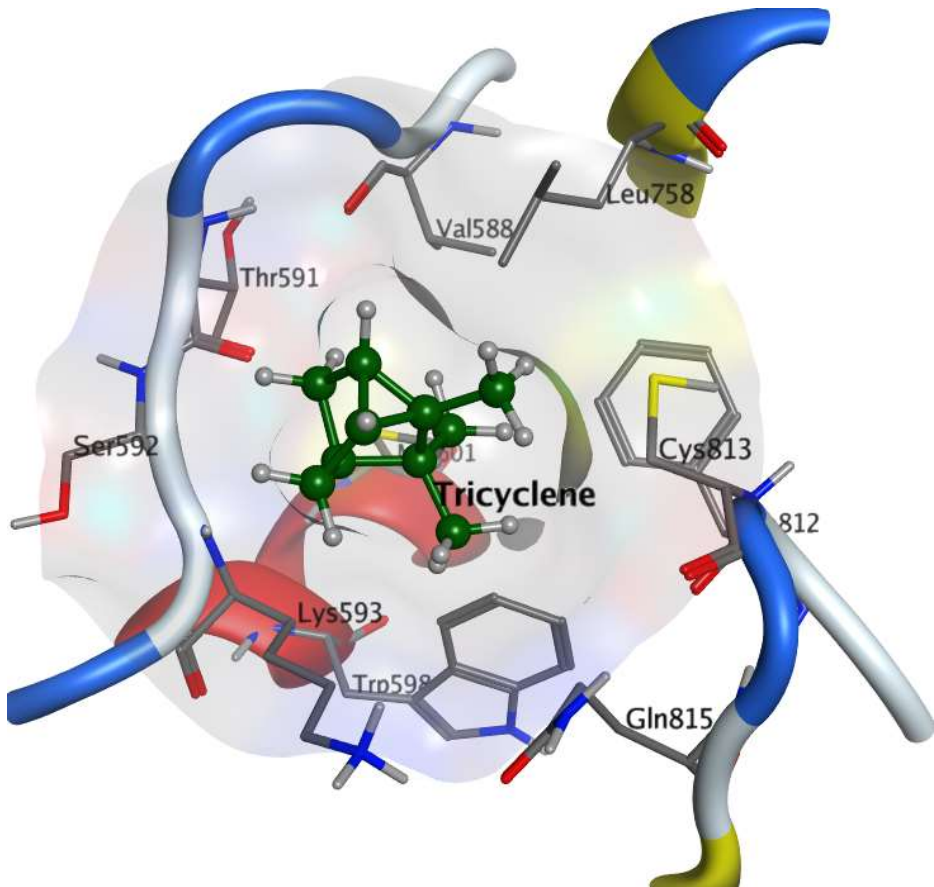 | <p>-4.10620</p> <p>2.0938</p>         |

|                                   |                                                                                      |                              |
|-----------------------------------|--------------------------------------------------------------------------------------|------------------------------|
| <p><math>\alpha</math>-Pinene</p> | 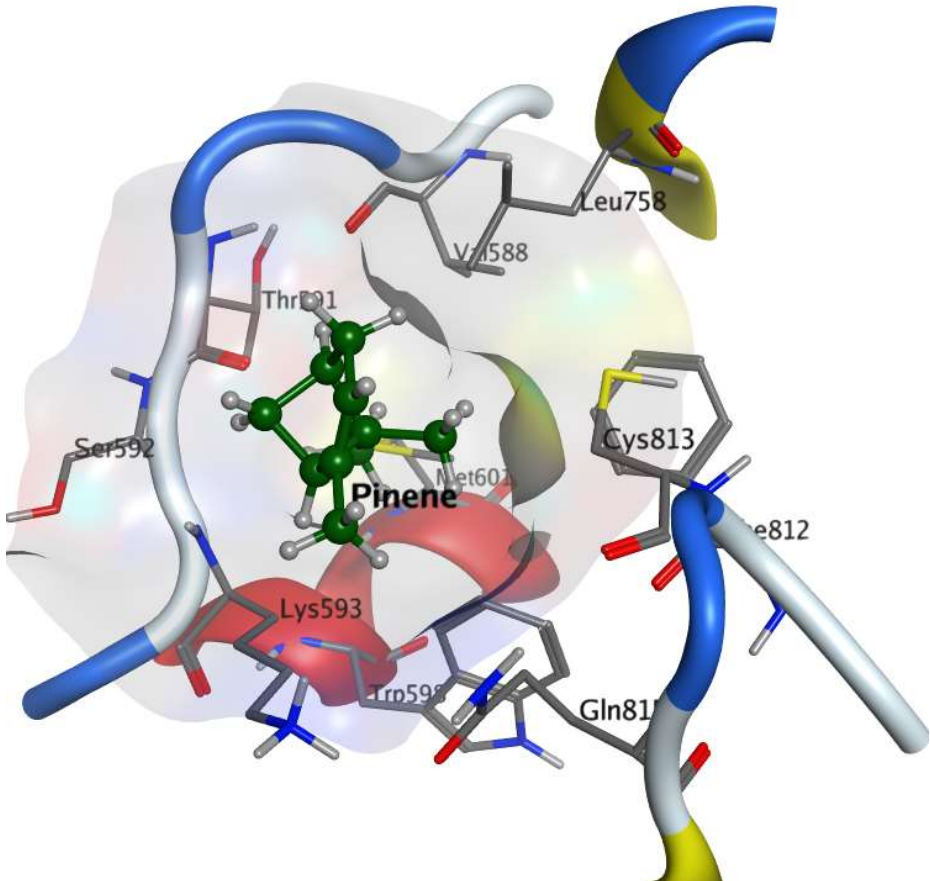  | <p>-4.2618</p> <p>1.7163</p> |
| <p><i>d</i>-Camphene</p>          |  | <p>-3.9284</p> <p>1.2590</p> |

|                                 |                                                                                      |                              |
|---------------------------------|--------------------------------------------------------------------------------------|------------------------------|
| <p>Limonene</p>                 | 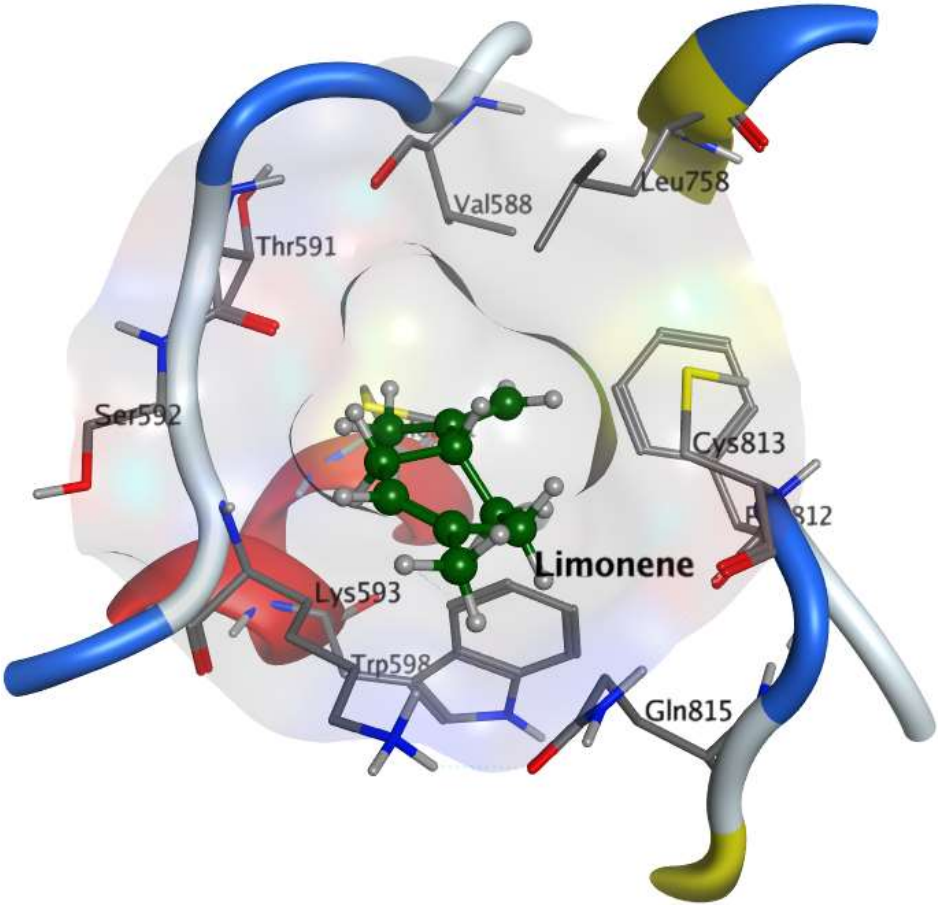  | <p>-4.5654</p> <p>0.9815</p> |
| <p><i>trans</i>-Pinocarveol</p> |  | <p>-4.2639</p> <p>1.3717</p> |



|                                             |                                                                                      |                              |
|---------------------------------------------|--------------------------------------------------------------------------------------|------------------------------|
| <p>Borneol</p>                              | 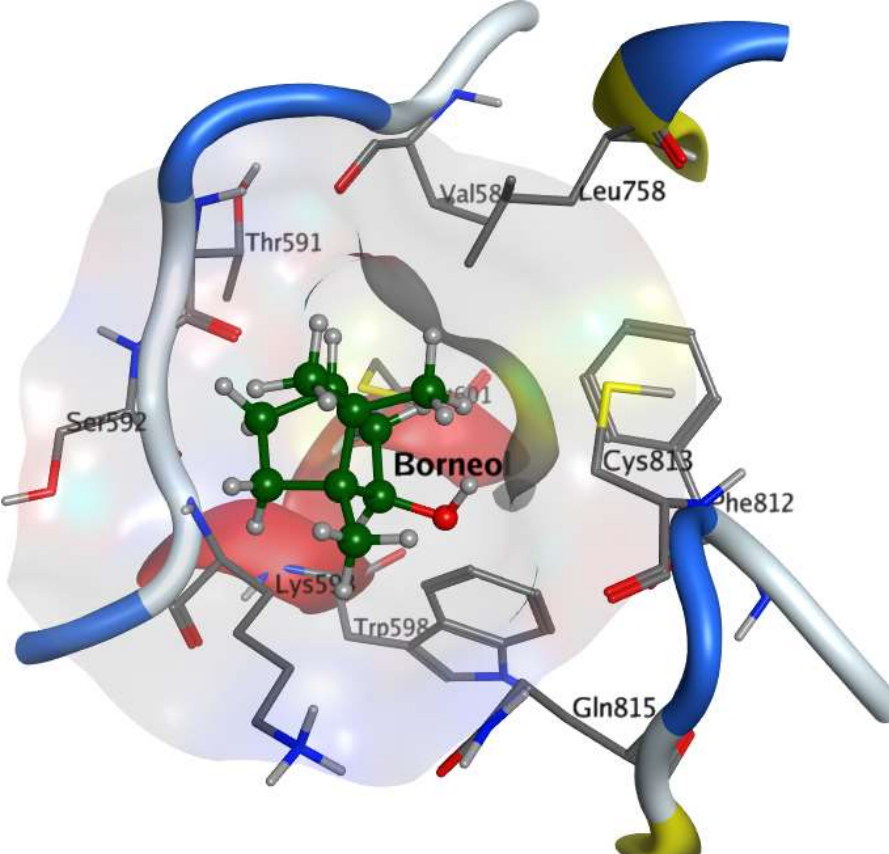  | <p>-4.0815</p> <p>1.4960</p> |
| <p><math>\alpha</math>-Phellandren-8-ol</p> |  | <p>-4.3839</p> <p>2.0164</p> |

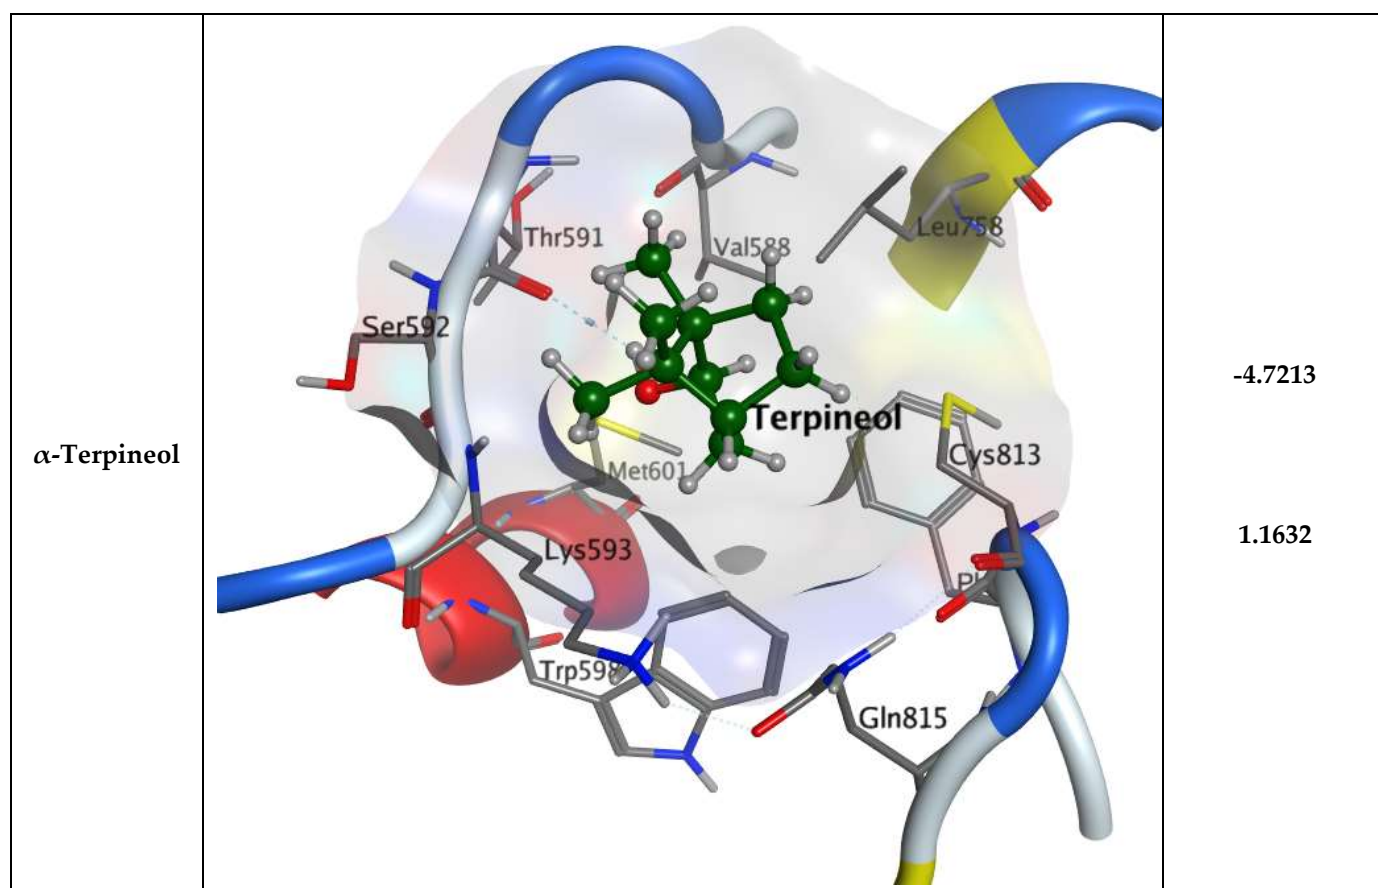

**Table S3.** Molecular docking details of *A. robusta* bark EO with RBD.

| Component name                               | Energy score (S)<br>(kcal/mol) | RMSD    | Amino acid residues forming |              |
|----------------------------------------------|--------------------------------|---------|-----------------------------|--------------|
|                                              |                                |         | H-bond                      | H- <i>pi</i> |
| <b>Co-crystallized ligand (NAG)</b>          | -4.5304                        | 1.5097  | ASN 343                     | -            |
| <b>Tricyclene</b>                            | -4.0962                        | 1.4562  | -                           | -            |
| <b><math>\alpha</math>-Pinene</b>            | -3.8556                        | 1.1748  | -                           | -            |
| <b><i>d</i>-Camphene</b>                     | -4.0584                        | 1.8286  | -                           | -            |
| <b>Limonene</b>                              | -3.9563                        | 1.5847  | -                           | -            |
| <b><i>trans</i>-Pinocarveol</b>              | -4.1561                        | 1.5353  | VAL 367                     | -            |
| <b>Borneol</b>                               | -3.9368                        | 2.1738  | ASN 343                     | -            |
| <b><math>\alpha</math>-Phellandren-8-ol</b>  | -4.0385                        | 1.2068  | ASN 343                     | -            |
| <b><math>\alpha</math>-Terpineol</b>         | -4.2190                        | 1.9985  | ASN 343                     | -            |
| <b>2,4-Thujadiene</b>                        | -3.9973                        | 1.7303  | -                           | -            |
| <b>L-<math>\beta</math>-Pinene</b>           | -3.9127                        | 1.5637  | -                           | -            |
| <b><i>m</i>-Cymene</b>                       | -4.1107                        | 1.1504  | -                           | PHE 338      |
| <b><math>\gamma</math>-Terpinene</b>         | -4.2683                        | 1.5342  | -                           | -            |
| <b><math>\alpha</math>-Campholenal</b>       | -4.1039                        | 1.3665  | -                           | -            |
| <b>Camphor</b>                               | -4.0149                        | 1.6277  | GLY 339                     | -            |
| <b>Camphene hydrate</b>                      | -3.9441                        | 1.4994  | --                          | -            |
| <b>Trans-Pinocamphone</b>                    | -4.0541                        | 1.8483  | -                           | TRP 436      |
| <b>Pinocarvone</b>                           | -3.9968                        | 1.4778  | -                           | -            |
| <b>Isoborneol</b>                            | -3.9323                        | 1.9775  | -                           | -            |
| <b><i>cis</i>-Verbenol</b>                   | -4.0902                        | 1.4764  | SER 371                     | -            |
| <b>L-terpinen-4-ol</b>                       | -4.2719                        | 0.85503 |                             | -            |
| <b>Myrtenal</b>                              | -3.9592                        | 1.7403  | LEU 368                     | -            |
| <b>Verbenone</b>                             | -4.1378                        | 1.5315  | -                           | -            |
| <b><i>trans</i>-Carveol</b>                  | -4.1642                        | 1.2461  | -                           | -            |
| <b>(-)-Carvone</b>                           | -4.1215                        | 0.9209  | -                           | PHE 342      |
| <b>Bornyl acetate</b>                        | -4.5766                        | 0.9564  | -                           | TRP 436      |
| <b><math>\alpha</math>-Terpineol acetate</b> | -4.7246                        | 0.9855  | -                           | -            |

**Table S4.** The target enzymes involved for docking of the major components of *A. robusta* bark EO.

| Proteins (PDB)                                                                                       | Resolution | Cognate Ligand | Structure of the cognate ligand                                                       | RMSD   | Energy score (S)<br>(kcal/mol) |
|------------------------------------------------------------------------------------------------------|------------|----------------|---------------------------------------------------------------------------------------|--------|--------------------------------|
| COVID-19 main protease in complex with an inhibitor N3( <b>6LU7</b> )                                | 2.16 Å     | N3             | 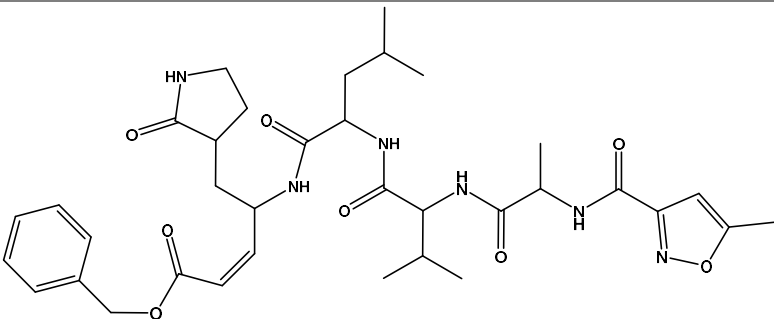    | 1.9061 | -8.4596                        |
| COVID-19 RNA-dependent RNA polymerase bound to suramin: ( <b>7D4F</b> )                              | 2.57 Å     | H3U            |   | 1.8239 | -7.7170                        |
| COVID-19 virus spike receptor-binding domain complexed with a neutralizing antibody: ( <b>7BZ5</b> ) | 1.84 Å     | NAG            |  | 1.5097 | -4.5304                        |
